# Supplementary material for: An effective encapsulation for perovskite solar cells based on building-integrated photovoltaics
Source: Royal Society of Chemistry journal article supplement (doi:10.1039/d2tc01696f), 2022-01-01
Supplement: d2tc01696f1.pdf [file d2tc01696f1.pdf]

## Supporting Information

# An Effective Encapsulation for Perovskite Solar Cells Based on Its Building Integration Photovoltaics

*Qi Wei<sup>a §</sup>, Xiaonan Huo<sup>b §</sup>, Qiang Fu<sup>a</sup>, Ting Wang<sup>a</sup>, Heming Zhao<sup>a</sup>, Yixuan Wang<sup>a</sup>, Jiansong Yang<sup>a</sup>, Siqi Zhan<sup>a</sup>, Liang Zhou<sup>c</sup>, Shiwei Wang<sup>a\*</sup> and Peng-gang Yin<sup>b\*</sup>*

<sup>a</sup> School of Chemical Engineering, Advanced Institute of Materials Science, Changchun University of Technology, Changchun 130012, P. R. China, E-mail: wswjldx2004@163.com (S. Wang)

<sup>b</sup> Key Laboratory of Bio-inspired Smart Interfacial Science and Technology of Ministry of Education, School of Chemistry and Environment, Beihang University, Beijing 100191, China, E-mail: pgyin@buaa.edu.cn (P. Yin)

<sup>c</sup> Chinese Acad Sci, Changchun Inst Appl Chem, State Key Lab Rare Earth Resource Utilizat, Changchun 130022, P.R. China.

<sup>§</sup>Q. Wei and X. Huo contributed equally to this work.

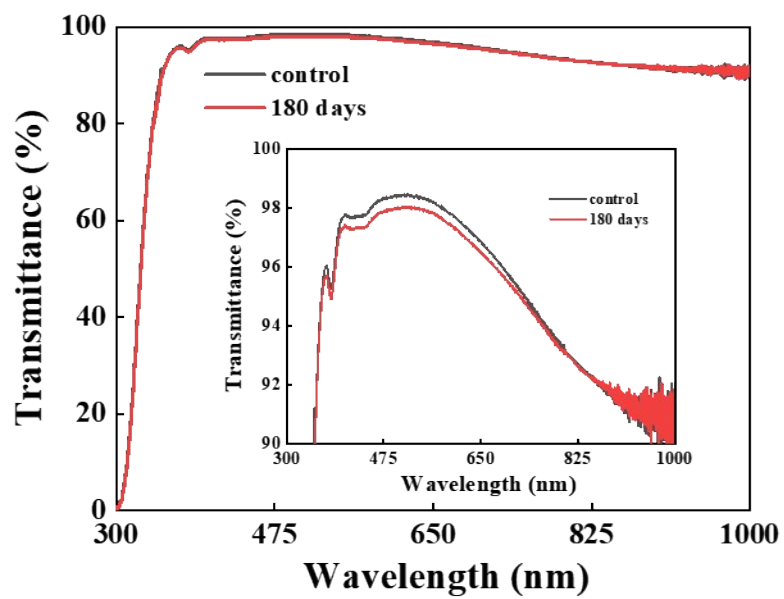

**Fig. S1** 95.1% of the transmittance is for the AHMA/Glass (control), and 94.9% after 180 days under light illumination.

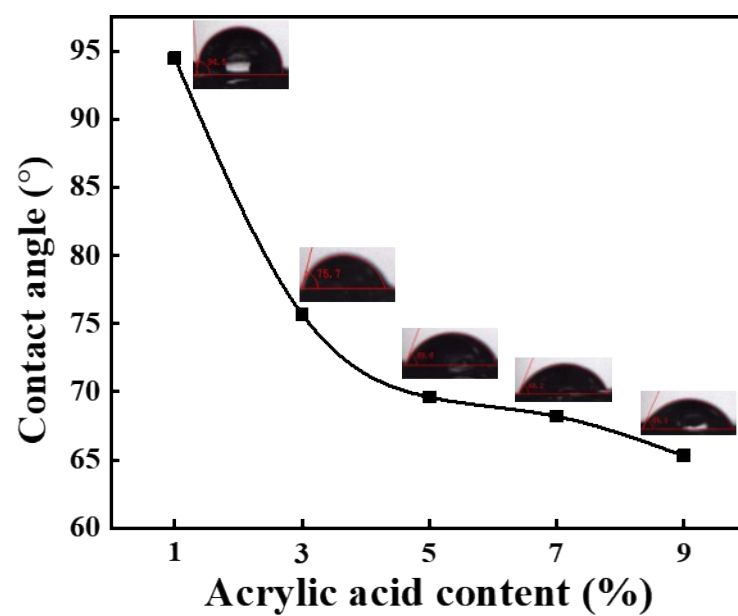

**Fig. S2** The water contact angle of AHMA with different acrylic acid content.

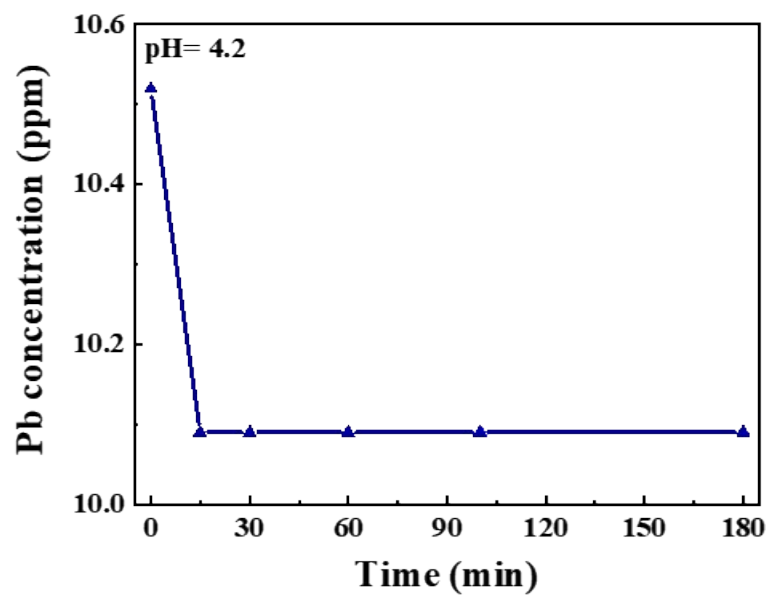

**Fig. S3** Lead ion concentration tracking of  $\text{PbNO}_3$  solution ( $\text{pH} = 4.2$ ) soaked with AHMA film at  $40^\circ\text{C}$  (140 mg of AHMA coated on  $25 \times 25\text{mm}$  of glass).

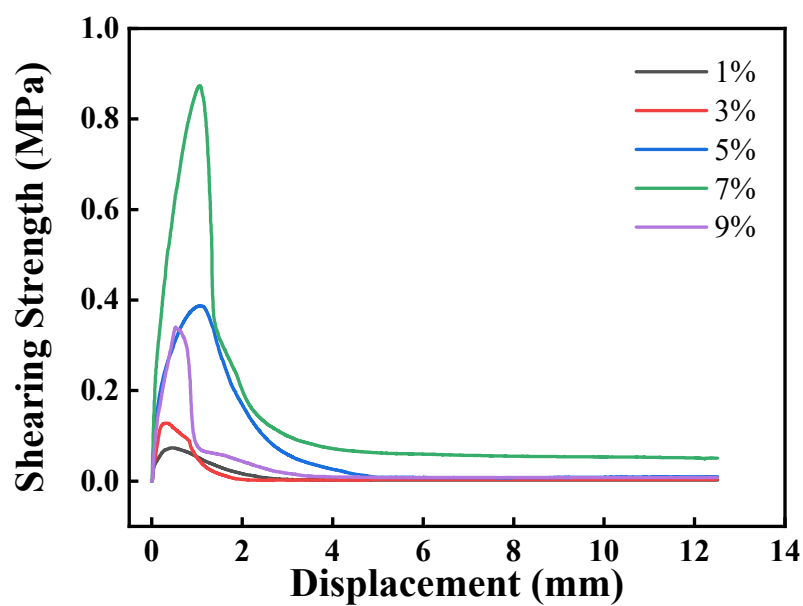

**Fig. S4** Shear strength between glass and AHMA with different content of acrylic acid. Two glasses sheets bonded by a AHMA film (12.5 mm \* 25 mm). It was measured on an electronic universal testing machine at a deflection rate of 5 mm/min.

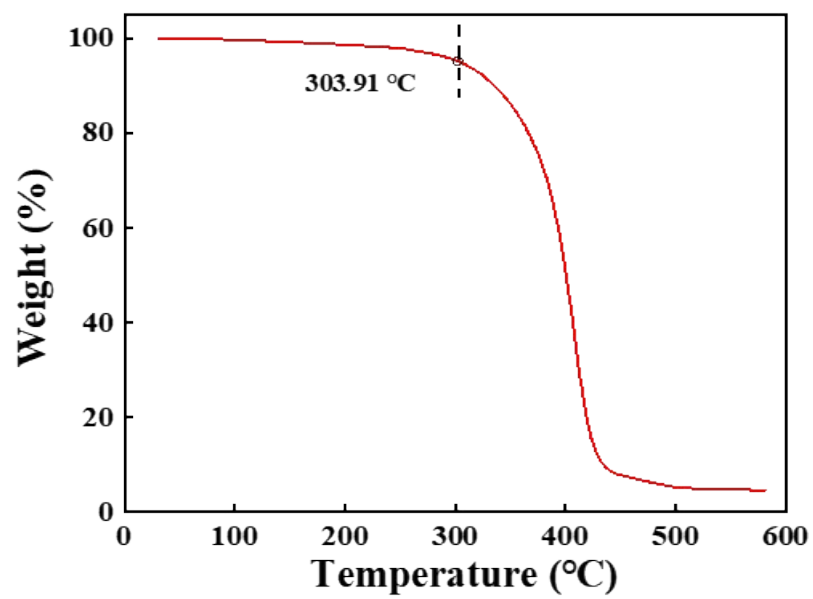

**Fig. S5** TG curves of AHMA with 7% of acrylic acid.

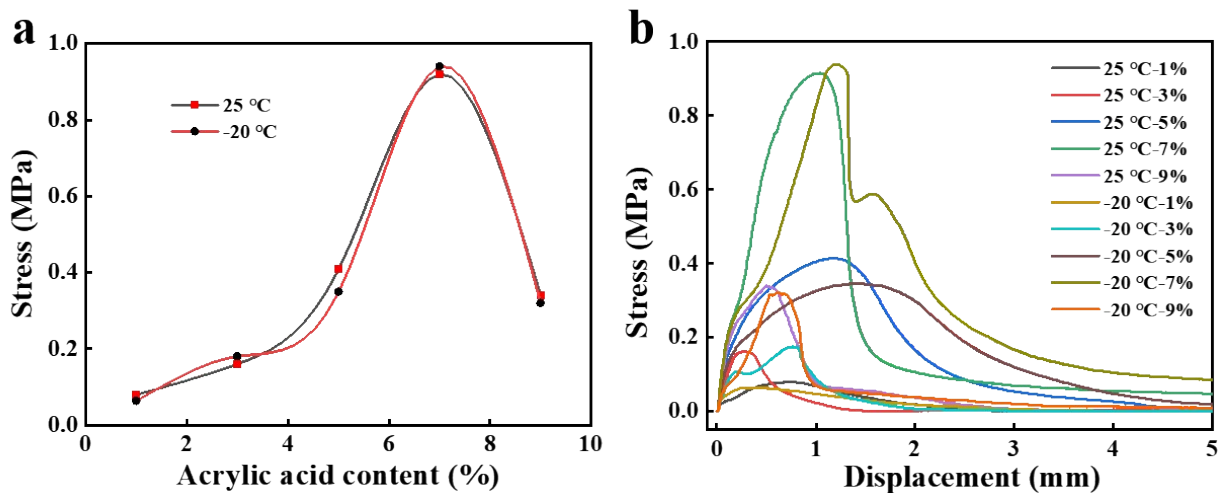

**Fig. S6** Good cold resistance of the AHMA materials has been confirmed, the bond shear strength of which at -20 °C is consistent with that at room temperature.

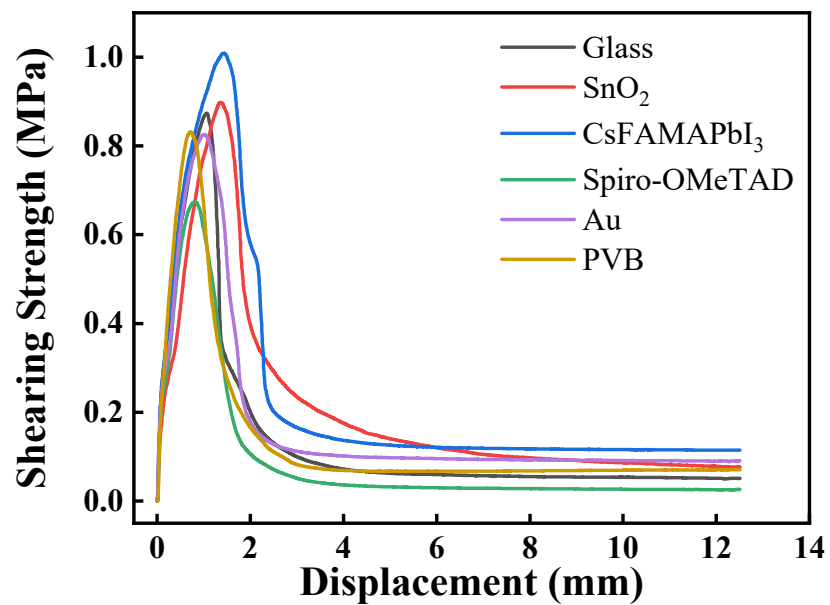

**Fig. S7** The shear strengths among AHMA with different materials of each layer in photovoltaic building integrated module.

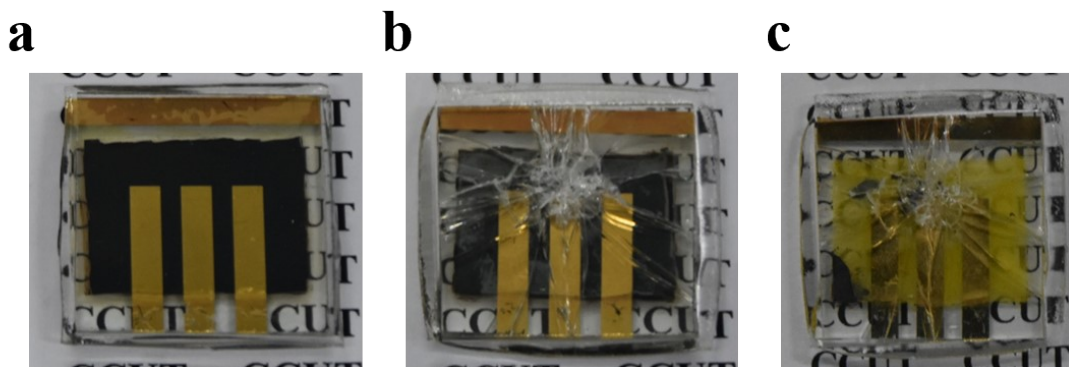

**Fig. S8** Lead leakage on perovskite modules. (a) Image of the PSCs encapsulated with PVB-glass. (b) Images of the damaged PSCs encapsulated with PVB-glass by falling ball impact with a 100 g of steel ball at 50.8 cm of high. (c) Images of the damaged PSCs after dripping by heavy rainfall (pH=4.2) at 5 mL h<sup>-1</sup> for 6 h.

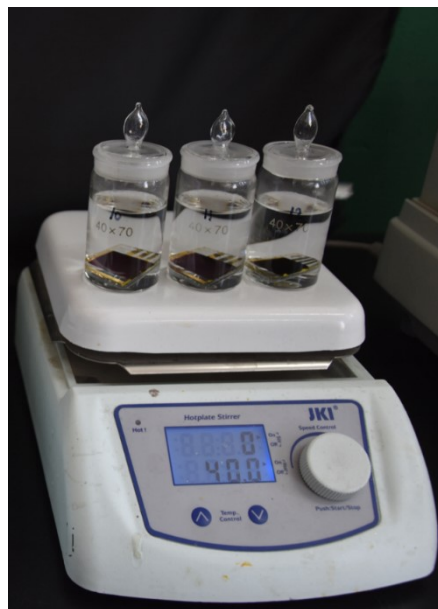

**Fig. S9** Images of the damaged PSCs soaking in 40 mL of water (pH=4.2 and 6.8).

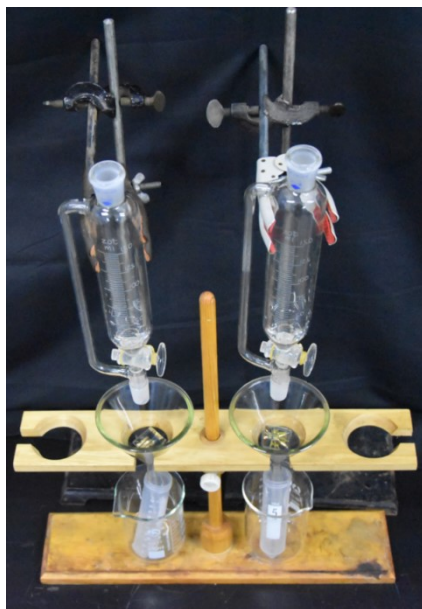

**Fig. S10** Setup of water-dripping tests. Photograph of the setup for water-dripping tests.

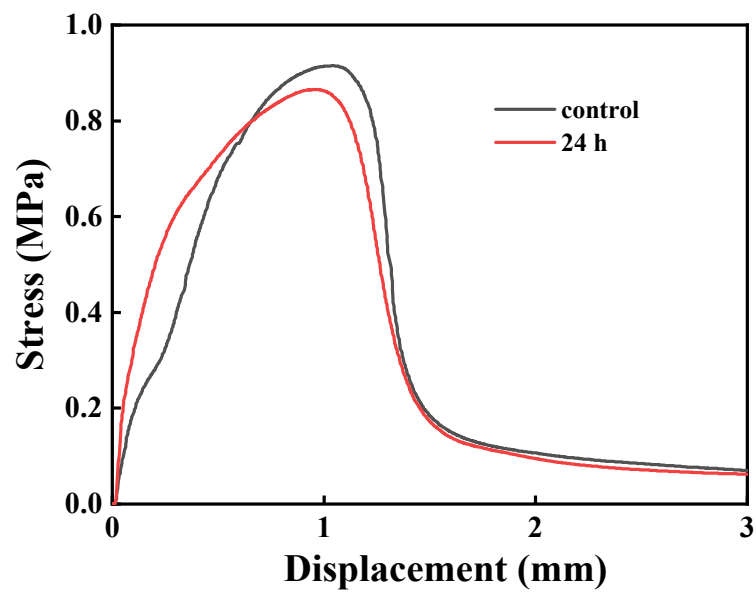

**Fig. S11** After soaking in water for 24 hours, the bonding shear strength between AHMA with 7% of acrylic acid and glass decreased by less than 0.05 MPa.

**Table S1.** Lead ion concentration tracking of PbNO<sub>3</sub> solution (pH= 4.2) soaked with AHMA film at 40 °C (140 mg of AHMA coated on 25\*25mm of glass).

| <b>Time (min)</b> | <b>Pb concentration (ppm)</b> |
|-------------------|-------------------------------|
| 0                 | 10.52                         |
| 15                | 10.09                         |
| 30                | 10.09                         |
| 60                | 10.09                         |
| 100               | 10.09                         |
| 180               | 10.09                         |

**Table S2.** The water contact angle of AHMA film with different acrylic acid content; Shear strength between glass and AHMA with different content of acrylic acid; Adhesion holding force between glass and AHMA with different acrylic acid content at 70 °C, based on 12\*25 mm of the adhesive area and 500 g of the weight.

| Acrylic acid content (%) | Water contact angle (°) | Shearing strength (MPa) | Time(s) |
|--------------------------|-------------------------|-------------------------|---------|
| 1                        | 94.5                    | 0.08                    | 45      |
| 3                        | 75.7                    | 0.15                    | 62      |
| 5                        | 69.6                    | 0.40                    | 91      |
| 7                        | 68.2                    | 0.91                    | 103     |
| 9                        | 65.3                    | 0.34                    | 98      |

**Table S3.** The shear strengths among AHMA with different materials of each layer in photovoltaic building integrated module.

| <b>Material</b>      | <b>Shearing strength (MPa)</b> |
|----------------------|--------------------------------|
| Glass                | 0.89                           |
| SnO <sub>2</sub>     | 0.89                           |
| FAMAPbI <sub>3</sub> | 1.04                           |
| Spiro-OMeTAD         | 0.69                           |
| AU                   | 0.84                           |
| PVB                  | 0.84                           |

**Table S4.** Lead leakage on perovskite modules. Non-encapsulated (Control) and AHMA-PVB-Glass encapsulated (Encapsulation) PSCs, impact resistance of which was detected by free fall impact with a 100 g of steel ball at 50.8 cm of high. Images of the damaged PSCs after soaking in 40 mL of water (pH=4.2 and 6.8) for different time. Detection of Pb<sup>2+</sup> concentration in water after soaking with damaged PSC modules with and without encapsulation.

| <b>Time<br/>(min)</b> | <b>Control<br/>pH=4.2</b> | <b>Encapsulation<br/>pH=4.2</b> | <b>Encapsulation<br/>pH=6.8</b> |
|-----------------------|---------------------------|---------------------------------|---------------------------------|
| 0                     | 0                         | 0                               | 0                               |
| 30                    | 2.868                     | 1.138                           | 0.1106                          |
| 60                    | 3.807                     | 1.104                           | 0.1705                          |
| 90                    | 4.100                     | 0.8094                          | 0.0637                          |
| 120                   | 4.317                     | 0.8090                          | 0.4262                          |
| 150                   | 4.500                     | 1.079                           | 0.1476                          |
| 180                   | 4.607                     | 0.8244                          | 0.4045                          |

**Table S5.** Detection of  $\text{Pb}^{2+}$  concentration in solution from the damaged PSC modules with and without encapsulation by dripping with heavy rainfall for different time.

| <b>Time (h)</b> | <b>AHMA-PVB</b> | <b>PVB</b> | <b>Control</b> |
|-----------------|-----------------|------------|----------------|
| 1.5             | 0.0010          | 0.1039     | 2.384          |
| 3               | 0.3915          | 0.5479     | 3.524          |
| 6               | 0.7029          | 1.992      | 17.32          |

**Table S6.** Summary of the photovoltaic parameters obtained from the champion devices for pre- and post-encapsulation. Measurements were performed with 0.0625 cm<sup>2</sup> active area and under AM 1.5G solar illumination.

| <b>Sample</b>           | <b>V<sub>oc</sub></b><br><b>(V)</b> | <b>J<sub>sc</sub></b><br><b>(mA cm<sup>-2</sup>)</b> | <b>FF</b> | <b>PCE</b><br><b>(%)</b> |
|-------------------------|-------------------------------------|------------------------------------------------------|-----------|--------------------------|
| Control (reverse)       | 1.14                                | 24.13                                                | 0.79      | 21.78                    |
| Control (forward)       | 1.13                                | 24.24                                                | 0.80      | 21.96                    |
| Encapsulation (reverse) | 1.12                                | 24.20                                                | 0.76      | 20.59                    |
| Encapsulation (forward) | 1.12                                | 24.21                                                | 0.77      | 20.88                    |

**Movie S1.**

Falling ball impact (100 g of steel balls, 50.8 cm) video of unencapsulated devices.

**Movie S2.**

Falling ball impact (100 g of steel balls, 50.8 cm) video of encapsulated devices.
